# Supplementary material for: Primary Ciliary Dyskinesia Patient-Specific hiPSC-Derived Airway Epithelium in Air-Liquid Interface Culture Recapitulates Disease Specific Phenotypes In Vitro
Source: MDPI journal article supplement (doi:10.3390/cells12111467), 2023-05-24
Supplement: s1 [file s1]

## Supplemental Material

Table S1. Duration of anterior foregut induction for different hiPS cell lines.

| Cell line                 | Duration of AFE 1 | Duration of AFE 2 |
|---------------------------|-------------------|-------------------|
| WT                        | 24h               | 24h               |
| DNAH5 <sup>mut</sup> CI22 | 48h               | 48h               |
| DNAH5 <sup>mut</sup> CI24 | 48h               | 48h               |
| NME5 <sup>mut</sup>       | 48h               | 48h               |

Table S2. Assay IDs and primer sequences for qRT-PCR.

| Target Gene | Assay ID / Primer sequence                                      |
|-------------|-----------------------------------------------------------------|
| CCDC40      | qHsaCED0045023                                                  |
| CK5         | qHsaCED0005398                                                  |
| FOXJ1       | FW: AGCCAGGCACCATACTTA<br>REV: GCTCTCCGCCATGTCTGC               |
| P63         | FW: TCATTTGATTGAGTAGAGGGGAAC<br>REV: CTCCAACACAACCTGCTGTTACACAT |
| NKX2.1      | FW: CGGCATGAACATGAGCGGCAT<br>REV: GCCGACAGGTACTTCTGTTGCTTG      |
| NGFR        | FW: GCCAGGACAAGCAGAACAC<br>REV: CGTGTAATCCAACGGCCAG             |
| MUC5AC      | FW: GCACCAACGACAGGAAGGATGAG<br>REV: CACGTTCCAGAGCCGGACAT        |
| CCSP        | FW: GGACACCCTCCCCAAAAGC<br>REV: TGGTGGGCGTGGACTCAAAG            |
| betaActin   | FW: ATTGCCGACAGGATGCAGAA<br>REV: GGGCCGGAATCGTCATACTC           |
| GAPDH       | FW: CCATCTTCCAGGAGCGAGATC<br>REV: GCAGAGATGATGACCCTTTTGG        |

Table S3. primary antibodies.

| Antibody                        | Vendor, RRID, Dilution                              |
|---------------------------------|-----------------------------------------------------|
| anti-MUC5AC                     | Thermo Fisher Scientific, RRID: AB_10978001; 1:200  |
| anti-acetylated-tubulin (AcTub) | Cell Signaling Technology, RRID: AB_10544694; 1:800 |
| anti-CCSP (CC10)                | Santa Cruz Biotechnology, RRID: AB_10915481; 1:200  |
| anti-cytokeratin 5 (CK5)        | Abcam, RRID: AB_869890; 1:300                       |
| anti-p63                        | Abcam, RRID: AB_305870; 1:300                       |
| anti-AcTub                      | Sigma-Aldrich, RRID: AB_609894; 1:2000              |
| anti-DNAH5                      | Atlas Antibodies, RRID: AB_10672348; 1:500          |
| anti-NME5                       | Sigma-Aldrich, RRID: AB_10960286; 1:400             |
| anti-RSPH1                      | Sigma-Aldrich, RRID: AB_1858392; 1:200              |
| anti-RSPH4A                     | Sigma-Aldrich, RRID: AB_10601612; 1:200             |
| anti-RSPH11                     | Sigma-Aldrich, RRID: AB_10673415; 1:200             |
| anti-CXCR4                      | Thermo Fisher Scientific, RRID: AB_1724113; 1:33.3  |
| anti-CKIT                       | Thermo Fisher Scientific, RRID: AB_2043797; 1:33.3  |

|             |                                           |
|-------------|-------------------------------------------|
| anti-EpCAM  | BD Biosciences, RRID: AB_400262; 1:25     |
| anti-NKX2.1 | Miltenyi Biotec, RRID: AB_2751514; 1:2000 |

Table S4. secondary antibodies.

| <b>Antibody</b>          | <b>Vendor, RRID, Dilution</b>                       |
|--------------------------|-----------------------------------------------------|
| donkey anti-mouse AF488  | Jackson ImmunoResearch Labs, RRID:AB_2340846; 1:300 |
| donkey anti-rabbit Cy5   | Jackson ImmunoResearch Labs, RRID:AB_2340607; 1:300 |
| donkey anti-mouse Cy5    | Jackson ImmunoResearch Labs, RRID:AB_2340819; 1:300 |
| donkey anti-rabbit AF488 | Jackson ImmunoResearch Labs, RRID:AB_2313584; 1:300 |

**A**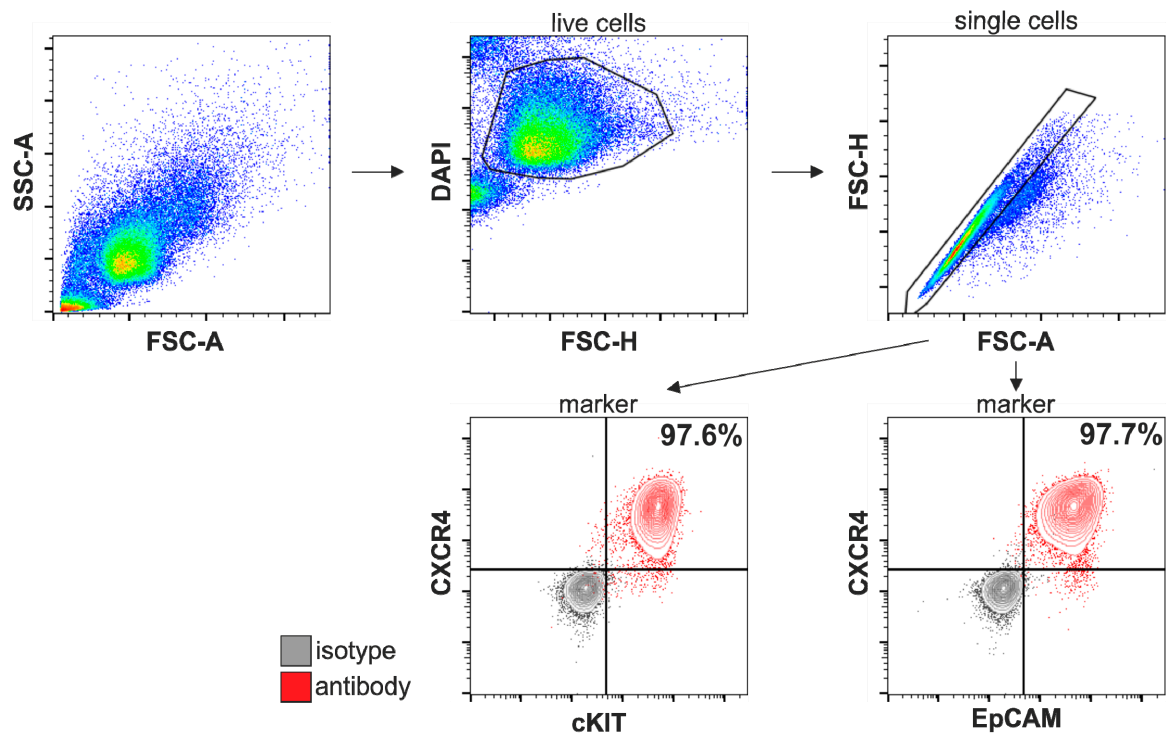**B**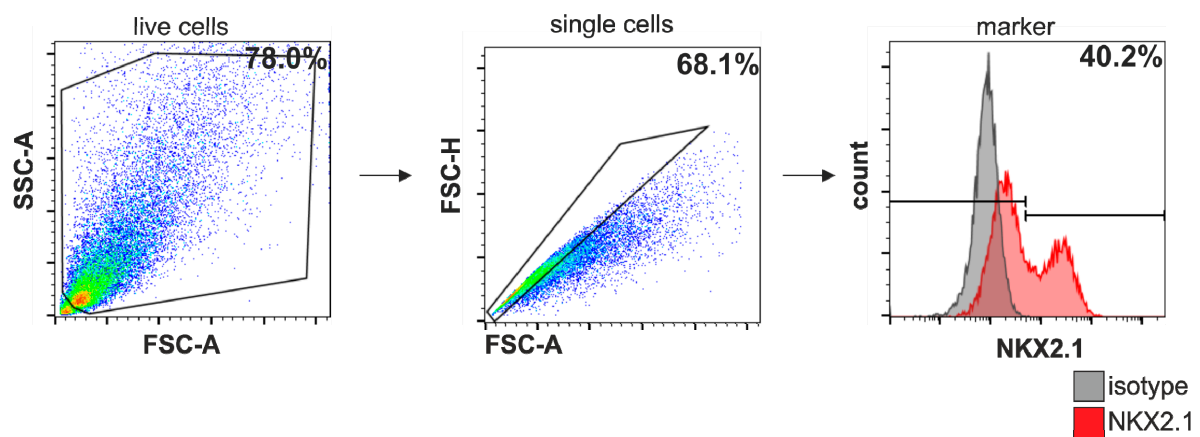

**Supplemental Figure S1.** Gating strategy for flow cytometric analysis. Gating strategy for identification of definitive endoderm (DE) cell population at day 3 of differentiation using antibodies against CXCR4, cKIT and EpCAM (red) and respective isotype controls (grey) (A). Gating strategy for identification of lung progenitor cells at day 14 of differentiation using a NKX2.1-specific antibody (red) and respective isotype control (grey) (B).
